# Supplementary material for: Evolutionary Capacitance and Control of Protein Stability in Protein-Protein Interaction Networks
Source: PLOS journal article supplement (doi:10.1371/journal.pcbi.1003023), 2013-04-04
Supplement: S6 (10.1371/journal.pcbi.1003023.s006) [file journal.pcbi.1003023.s006]

|                        | Aggregation | $\Delta\Delta G_{ppI}$ | Control variables |       |
|------------------------|-------------|------------------------|-------------------|-------|
|                        |             |                        | $C$               | $F$   |
| $\Delta\Delta G_{ppI}$ | 0.11*       | -                      | 0.11*             | 0.02  |
| $C$                    | -0.11*      | -0.10*                 | -                 | -0.03 |
| $F$                    | -0.15*      | -0.11*                 | -0.10*            | -     |

**TABLE S2:** The second column reports the spearman rank correlation between the TANGO aggregation propensity and  $\Delta\Delta G_{ppI}$ , total protein concentration  $C$ , and LMA estimated free monomer concentration  $F$ . The Asterix implies  $p < 10^{-3}$ . The third column reports the partial correlation between aggregation propensity and  $C$  and  $F$  when  $\Delta\Delta G_{ppI}$  is controlled. The fourth column reports the partial correlation between aggregation propensity and  $\Delta\Delta G_{ppI}$  and  $F$  when  $C$  is controlled and finally, the fifth column reports the partial correlation between aggregation propensity and  $\Delta\Delta G_{ppI}$  and  $C$  when  $F$  is controlled. Note, the correlation between aggregation propensity and estimated free monomer concentration is statistically significant even after controlling for total concentration.
