# Supplementary material for: Evolutionary Capacitance and Control of Protein Stability in Protein-Protein Interaction Networks
Source: PLOS journal article supplement (doi:10.1371/journal.pcbi.1003023), 2013-04-04
Supplement: S9 (10.1371/journal.pcbi.1003023.s009) [file journal.pcbi.1003023.s009]

|                        | Aggregation | $\Delta\Delta G_{PPI}$ | Control variables |       |
|------------------------|-------------|------------------------|-------------------|-------|
|                        |             |                        | $C$               | $F$   |
| $\Delta\Delta G_{PPI}$ | 0.11*       | -                      | 0.11*             | 0.02  |
| $C$                    | -0.11*      | -0.11*                 | -                 | -0.02 |
| $F$                    | -0.14*      | -0.10*                 | -0.10*            | -     |

**TABLE S5:** Analysis similar to **Table S2** when the stabilities of all proteins are set to their minimum  $\Delta G_{\text{folding}} = 0$ .
