# Supplementary material for: Evolutionary Capacitance and Control of Protein Stability in Protein-Protein Interaction Networks
Source: PLoS Comput Biol. 2013 Apr 4;9(4):e1003023. doi: 10.1371/journal.pcbi.1003023 (PMC3617028; doi:10.1371/journal.pcbi.1003023)
Supplement: Table S4 — A table reporting correlations between stability and interaction when protein stabilities depend on their chain length. (PDF) [file pcbi.1003023.s008.pdf]

| Aggregation            |        | Control variables      |        |        |
|------------------------|--------|------------------------|--------|--------|
|                        |        | $\Delta\Delta G_{PPI}$ | $C$    | $F$    |
| $\Delta\Delta G_{PPI}$ | 0.08*  | -                      | 0.08*  | -0.007 |
| $C$                    | -0.11* | -0.11*                 | -      | 0.007  |
| $F$                    | -0.15* | -0.12*                 | -0.10* | -      |

**TABLE S4:** Analysis similar to **Table S2** when protein stabilities are solely dependent on the chain length.
