# Supplementary material for: Evolutionary Capacitance and Control of Protein Stability in Protein-Protein Interaction Networks
Source: PLoS Comput Biol. 2013 Apr 4;9(4):e1003023. doi: 10.1371/journal.pcbi.1003023 (PMC3617028; doi:10.1371/journal.pcbi.1003023)
Supplement: Table S6 — A table reporting correlations between stability and interaction when all dissociation constants are set at 5 nM. (PDF) [file pcbi.1003023.s010.pdf]

| Aggregation            |        | Control variables      |        |       |
|------------------------|--------|------------------------|--------|-------|
|                        |        | $\Delta\Delta G_{PPI}$ | $C$    | $F$   |
| $\Delta\Delta G_{PPI}$ | 0.08*  | -                      | 0.10*  | 0.02  |
| $C$                    | -0.11* | -0.13*                 | -      | 0.004 |
| $F$                    | -0.17* | -0.13*                 | -0.11* | -     |

**TABLE S6:** Analysis similar to **Table S2** when the dissociation constants for all protein-protein interactions are set at  $K_{AB} = 5\text{nM}$ .
